# Supplementary material for: A randomised trial comparing weaning from CPAP alone with weaning using heated humidified high flow nasal cannula in very preterm infants: the CHiPS study
Source: HighWire-hosted journal article supplement (doi:10.1136/archdischild-2021-323636), 2022-07-18
Supplement: archdischild-2021-323636supp002_data_supplement.pdf [file archdischild-2021-323636supp002_data_supplement.pdf]

**eTable: PSS:NICU Survey**

| <b>Domains</b>                | <b>Variables</b>          | <b>Estimates</b> | <b>Standard Error</b> | <b>p-value*</b> |
|-------------------------------|---------------------------|------------------|-----------------------|-----------------|
| TOTAL: Sights and Sounds      | Group (ref=Not High Flow) | -0.437           | 0.766                 | 0.542           |
|                               | Time (ref=1 week)         | 1.308            | 0.588                 | <b>0.005</b>    |
|                               | Interaction (Group:Time)  | 0.0004           | 0.912                 | 0.9996          |
| TOTAL: Baby looks and behaves | Group (ref=Not High Flow) | 2.754            | 3.875                 | 0.403           |
|                               | Time (ref=1 week)         | 0.654            | 2.693                 | 0.533           |
|                               | Interaction (Group:Time)  | 1.133            | 3.900                 | 0.772           |
| TOTAL: Relationship           | Group (ref=Not High Flow) | 0.187            | 1.952                 | 0.374           |
|                               | Time (ref=1 week)         | 0.282            | 1.056                 | 0.086           |
|                               | Interaction (Group:Time)  | -3.785           | 1.853                 | <b>0.045</b>    |
| TOTAL: Communication          | Group (ref=Not High Flow) | 1.357            | 1.977                 | 0.534           |
|                               | Time (ref=1 week)         | 1.730            | 1.154                 | 0.171           |
|                               | Interaction (Group:Time)  | -0.302           | 2.285                 | 0.895           |
| Overall Total                 | Group (ref=Not High Flow) | 3.884            | 7.200                 | 0.792           |
|                               | Time (ref=1 week)         | 4.199            | 3.968                 | 0.472           |
|                               | Interaction (Group:Time)  | -3.861           | 6.282                 | 0.541           |

\*Tukey's test used for multiple comparisons
